# Supplementary material for: Digital Inequalities in the Use of Self-Tracking Diet and Fitness Apps: Interview Study on the Influence of Social, Economic, and Cultural Factors
Source: PubMed Central journal article supplement (PMC5935808; doi:10.2196/mhealth.9189), 2018-04-20
Supplement: mhealth_v6i4e101_app1.pdf [file mhealth_v6i4e101_app1.pdf]

1        **Supplementary File**

2

3        Acknowledgments

4

5The authors like to thank the INRA's Did'It Metaprogramme Board for the financial  
6support, and the NutriPerso coordinator, Louis-Georges Soler, for his support, Marie Plessz,  
7Sylvie Fainzang and Anne-Sylvie Pharabod for stimulating discussions, the management of  
8Weight Watchers® France and the leaders of the meetings that we attended for their  
9especially warm welcome, and the participants who agreed to be interviewed.  
10

11        Softwares used

12

13For content analysis of the interview data, we used Hyperbase software (CNRS –  
14Université Nice Sophia Antipolis, Nice, France). Hyperbase, which can be used for any  
15language with a roman alphabet, offers several functionalities, such as word counts or  
16measurements of textual specificities of interviews.  
17For the quantitative analysis, we used Stata®.  
18

19        Figure 1. PCA: Correlation circle axes 1 and 2 of the 25 practices

20

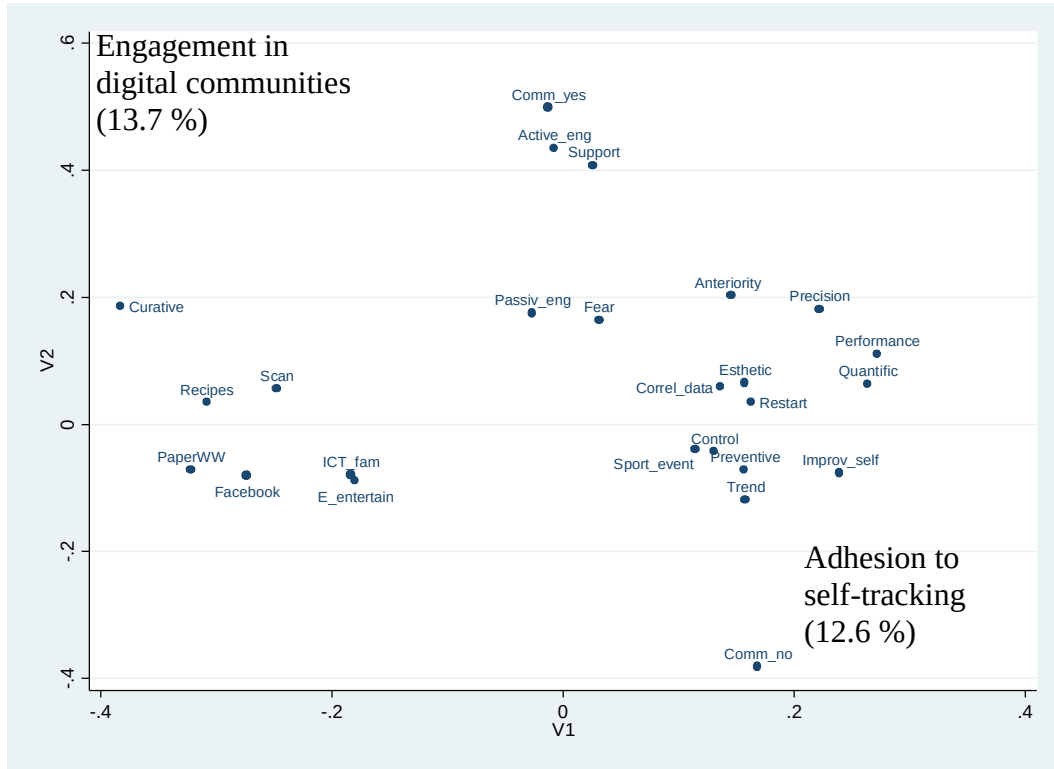

21

22

23Footnote: Axis 1 is interpreted as “adhesion to self-tracking”, and axis 2 as “engagement in  
 24digital communities”. Percentage of variance is between parentheses. See abbreviations in  
 25Table 1 below.

26

27

28

29

30 Figure 2. PCA: Principal plan axes 1 and 2 of descriptive  
 31sociodemographic variables

32

33

34

35

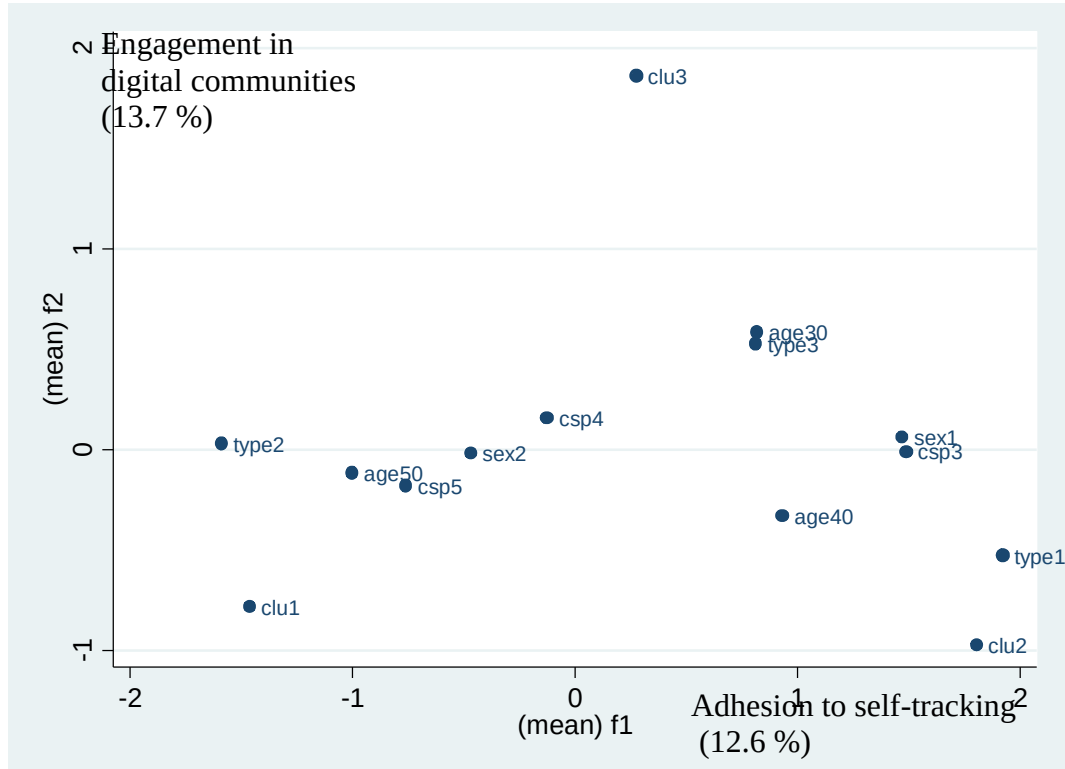

36

37Footnote: Axis 1 is interpreted as “adhesion to self-tracking”, and axis 2 as “engagement in  
38digital communities”. Percentage of variance is between parentheses. See abbreviations in  
39table 1 below.

40

41 Table 1 – Abbreviations of descriptive and socio-demographic variables

42

43

| Variable                                           | Abbreviation |
|----------------------------------------------------|--------------|
| Male                                               | sex1         |
| Female                                             | sex2         |
| Aged 20 to 29                                      | age 20       |
| Aged 30 to 39                                      | age30        |
| Aged 40 to 49                                      | age40        |
| Aged 50 and more                                   | age50        |
| Upper management, experts, and professionals       | csp3         |
| Intermediate professions and self-employed         | csp4         |
| Clerical and routine white and blue collar workers | csp5         |
| Cluster 1                                          | clu1         |
| Cluster 2                                          | clu2         |

5

6

3

|                          |       |
|--------------------------|-------|
| Cluster 3                | clu3  |
| Sport apps users         | type1 |
| Weight Watchers® members | type2 |
| MyFitnessPal users       | type3 |

44  
45  
46  
47  
48  
49

50 Table 2 - Correlation between active variables and cluster (Phi  
51coefficient)

52

| Themes                 | Active variables   | Cluster 1      | Cluster 2      | Cluster 3      |
|------------------------|--------------------|----------------|----------------|----------------|
| Functionalities        | Quantific          | -0.3895*       | 0.1568         | <b>0.2600*</b> |
|                        | Scan               | 0.1456         | -0.2460*       | 0.0834         |
|                        | Recipes            | <b>0.2905*</b> | -0.2968*       | -0.0206        |
|                        | Facebook_WW        | <b>0.3063*</b> | -0.1516        | -0.1772        |
| Uses                   | Improv_self        | -0.2271*       | <b>0.4097*</b> | -0.1552        |
|                        | Challenge          | -0.0729        | 0.1141         | -0.0330        |
|                        | Precision          | -0.3337*       | 0.1312         | <b>0.2258*</b> |
|                        | Trend              | -0.2145        | <b>0.4184*</b> | -0.1769        |
| Digital network        | Correl_data        | -0.2573*       | <b>0.3031*</b> | -0.0206        |
|                        | CommuYes           | -0.4144*       | -0.2974*       | <b>0.7240*</b> |
|                        | CommuNo            | 0.0639         | <b>0.5436*</b> | -0.5914*       |
|                        | Passiv_eng         | -0.3141*       | -0.1516        | <b>0.4776*</b> |
|                        | Active_eng         | -0.2233*       | -0.1726        | <b>0.4020*</b> |
| Relation to publishing | Support            | -0.2959*       | -0.1339        | <b>0.4413*</b> |
|                        | Anteriority        | -0.2432*       | 0.0280         | <b>0.2298*</b> |
|                        | PaperWW            | <b>0.5379*</b> | -0.2757*       | -0.3020*       |
| Familiarity with ICT   | Fear               | 0.0554         | -0.1781        | 0.1131         |
|                        | ICT_fam            | 0.1922         | -0.0128        | -0.1906        |
|                        | E_entertain        | <b>0.3150*</b> | -0.1615        | -0.1769        |
| Reasons for use        | Esthetic           | -0.2774*       | <b>0.2878*</b> | 0.0154         |
|                        | Preventive         | -0.2145        | <b>0.4184*</b> | -0.1769        |
|                        | Illness_management | -0.2145        | -0.0455        | <b>0.2702*</b> |
|                        | Curative           | <b>0.4315*</b> | -0.5049*       | 0.0312         |
|                        | Performance_sport  | -0.3618*       | <b>0.2228*</b> | 0.1672         |
|                        | Restart            | -0.2770*       | <b>0.4467*</b> | -0.1382        |



|     |             |        |        |        |         |         |         |         |
|-----|-------------|--------|--------|--------|---------|---------|---------|---------|
| 109 | Performance | 0.2724 | 0.1107 | 0.0350 | -0.2935 | 0.1232  | -0.3515 | -0.1646 |
| 110 | Restart     | 0.1632 | 0.0349 | 0.2655 | 0.4773  | -0.1732 | 0.0842  | 0.0978  |
| 111 | -----       |        |        |        |         |         |         |         |
| 112 |             |        |        |        |         |         |         |         |

113
